# Supplementary material
Source: HighWire-hosted journal article supplement (https://openheart.bmj.com/content/6/1/e001008)
Supplement: inline-supplementary-material-1 [file inline-supplementary-material-1.docx]

**APPENDIX 1: The Toronto Aortic Stenosis Quality of Life Questionnaire (TASQ)**

This questionnaire helps us to better understand your heart problem, in particular aortic stenosis and how it has affected you. For each question, please circle the number that best describes your current health situation.

**If the question does not apply to you, please circle the number ‘1’ to indicate that this item has not been affected.**

1. **ARE YOU SHORT OF BREATH?**

NOT VERY MUCH 1 2 3 4 5 6 7 VERY MUCH

1. **ARE YOU WORRIED ABOUT HAVING A HEART ATTACK OR DYING?**

NOT VERY MUCH 1 2 3 4 5 6 7 VERY MUCH

1. **DO YOUR HEART PROBLEMS INTERFERE WITH DOING DAILY CHORES?**

NOT VERY MUCH 1 2 3 4 5 6 7 VERY MUCH

1. **DO YOUR HEART PROBLEMS INTERFERE WITH GOING OUT TO VISIT FRIENDS OR SOCIAL EVENTS?**

NOT VERY MUCH 1 2 3 4 5 6 7 VERY MUCH

1. **DO YOUR HEART PROBLEMS INTERFERE WITH GOING OUT TO VISIT WITH FAMILY?**

NOT VERY MUCH 1 2 3 4 5 6 7 VERY MUCH

1. **DO YOUR HEART PROBLEMS INTERFERE WITH BEING ABLE TO WALK WITHOUT RESTING?**

NOT VERY MUCH 1 2 3 4 5 6 7 VERY MUCH

1. **ARE YOU SHORT OF BREATH OR VERY TIRED WHEN EXERCISING?**

NOT VERY MUCH 1 2 3 4 5 6 7 VERY MUCH

1. **ARE YOU FRUSTRATED ABOUT HAVING TO STAY OR GO TO THE HOSPITAL BECAUSE OF HEART PROBLEMS?**

NOT VERY MUCH 1 2 3 4 5 6 7 VERY MUCH

1. **ARE YOU FEELING DISCOURAGED ABOUT BEING VERY TIRED?**

NOT VERY MUCH 1 2 3 4 5 6 7 VERY MUCH

1. **ARE YOU WORRIED ABOUT WHAT WILL HAPPEN TO YOUR FAMILY IF YOU DON’T GET BETTER?**

NOT VERY MUCH 1 2 3 4 5 6 7 VERY MUCH

1. **ARE YOU WORRIED ABOUT WHAT WILL HAPPEN FINANCIALLY?**

NOT VERY MUCH 1 2 3 4 5 6 7 VERY MUCH

1. **DO YOU FEEL YOU ARE UNABLE TO MAKE PLANS FOR THE FUTURE?**

NOT VERY MUCH 1 2 3 4 5 6 7 VERY MUCH

1. **IS YOUR ENJOYMENT OF LIFE LIMITED BY HEALTH PROBLEMS?**

NOT VERY MUCH 1 2 3 4 5 6 7 VERY MUCH

1. **I WOULD RATE MY OVERALL HEART HEALTH TO BE:**

❑ Excellent ❑Very good ❑ Good ❑ Fair ❑ Poor ❑ Very Poor ❑ Terrible

1. **COMPARED TO TWO MONTHS AGO, HOW WOULD YOU RATE YOUR ABILITY TO DO THINGS:**

❑ Very much better than two months ago

❑ Much better than two months ago

❑ Somewhat better than two months ago

❑ About the same

❑ Somewhat worse than two months ago

❑ Much worse now than two months ago

❑ Very much worse than two months ago

1. **COMPARED TO TWO MONTHS AGO, DO YOU FEEL HOPEFUL THAT YOUR HEALTH WILL IMPROVE:**

NOT VERY MUCH 1 2 3 4 5 6 7 VERY MUCH
